# Supplementary material for: Highly active, water-compatible and easily separable magnetic mesoporous Lewis acid catalyst for the Mukaiyama–Aldol reaction in water
Source: Royal Society of Chemistry journal article supplement (doi:10.1039/c4gc00178h), 2014-01-01
Supplement: c4gc00178h1.pdf [file c4gc00178h1.pdf]

## Supporting Information

### Highly Active, Water-Compatible and Easily Separable Magnetic Mesoporous Lewis Acid Catalyst for Mukaiyama- Aldol Reaction in Water

Fang Zhang\*, Xiaotao Wu, Chao Liang, Xiaoyan Li, Zhen Wang, Hexing Li\*

The Education Ministry Key Lab of Resource Chemistry and Shanghai Key

Laboratory of Rare Earth Functional Materials, Shanghai Normal University,

Shanghai 200234, P. R. China

#### Experimental section

##### 1. Synthesis of SO<sub>3</sub>Na-functionalized magnetic mesoporous silica support (SO<sub>3</sub>Na-MCMSS)

0.20 g SiO<sub>2</sub>@Fe<sub>3</sub>O<sub>4</sub> particles were dispersed in a aqueous solution containing 0.64 g CTAB, 100 ml deionized water, 2.0 ml ammonia solution (28 wt %), and 140 ml ethanol. This mixture was ultrasonicated for 30 min and then mechanically stirred for another 30 min. Then, 0.625 ml TEOS was added dropwise to the above solution. After pre-hydrolysis for 30 min, 0.116 ml mercaptopropyltrimethoxysilane (MPTS) was introduced. After stirring for 12 h at 25°C, the products were collected with a magnet and washed repeatedly with ethanol and water. Finally, CTAB template was removed by repeated ethanol extraction under reflux condition. Next, 0.20 g solid

sample was suspended into 30 ml  $\text{H}_2\text{O}_2$  solution and stirred for 24 h. The obtained solid was washed and then added into 30 ml saturated NaCl solution for ion-exchange treatment, resulting in sodium propylsulphonate functionalized magnetic core-mesoporous silica shell composite.

## 1.2 Preparation of $\text{SO}_3\text{Na\&Ph}$ co-functionalized magnetic core-silica shell support ( $\text{SO}_3\text{Na\&Ph-MCSS}$ )

Briefly, 0.20 g  $\text{SiO}_2@\text{Fe}_3\text{O}_4$  was dispersed in 20 ml anhydrous toluene, followed by adding dropwise 0.12 ml MPTS and 0.12 ml PhTS under mechanical stirring. After being refluxed under an  $\text{N}_2$  atmosphere for 24 h, the solid product was filtered and washed thoroughly with toluene and  $\text{CH}_2\text{Cl}_2$ , leading to  $\text{SO}_3\text{Na\&Ph}$  co-functionalized magnetic core-silica shell composite.

## 1.3 Synthesis of $\text{SO}_3\text{Na\&Ph}$ co-functionalized MCM-41 support ( $\text{SO}_3\text{Na\&Ph-MCM-41}$ )

0.16 g CTAB was dissolved in 10 ml  $\text{H}_2\text{O}$  containing 6.0 g 28 wt% ammonia solution at  $40^\circ\text{C}$ , subsequently added 1.25 ml TEOS and stirred for 30 min. Then, 0.232 ml MPTS and 0.234 ml PhTS were added into the solution and stirred at  $40^\circ\text{C}$  for another 1.5 h. The mixture was transferred into an autoclave and kept at  $100^\circ\text{C}$  for 15 h. The white precipitate was filtrated and washed thoroughly with water, following by vacuum drying at  $80^\circ\text{C}$  overnight. The surfactant and other organic residues were removed by refluxing 500 ml ethanol solution containing 0.50 M HCl at  $80^\circ\text{C}$  for 24 h.

The obtained solid was washed and then added into 30 ml saturated NaCl solution for ion-exchange treatment, resulting in sodium propylsulphonate and phenyl co-functionalized mesoporous support.

#### 1.4 Preparation of SO<sub>3</sub>Na-functionalized Amberlyst-15 resin (SO<sub>3</sub>Na-Amberlyst-15)

1.0 g Amberlyst-15 sample was directly added into 30 ml saturated NaCl solution for ion-exchange treatment, leading to sodium propylsulphonate functionalized Amberlyst-15.

#### 1.5 Fabrication of Yb(OTf)<sub>2</sub>-SO<sub>3</sub>Na-MCMSS, Yb(OTf)<sub>2</sub>-SO<sub>3</sub>Na&Ph-MCSS, Yb(OTf)<sub>2</sub>-SO<sub>3</sub>Na&Ph-MCM-41 and Yb(OTf)<sub>2</sub>-SO<sub>3</sub>Na-Amberlyst-15 catalysts

0.20 g different functionalized supports were suspended into 30 ml ethanol containing 0.50 g Yb(OTf)<sub>3</sub>, respectively. After being stirred for 12 h, the black powder product was filtered and washed thoroughly with absolute ethanol to eliminate un-coordinated Yb(OTf)<sub>3</sub>, followed by vacuum drying at 60°C for 24 h.

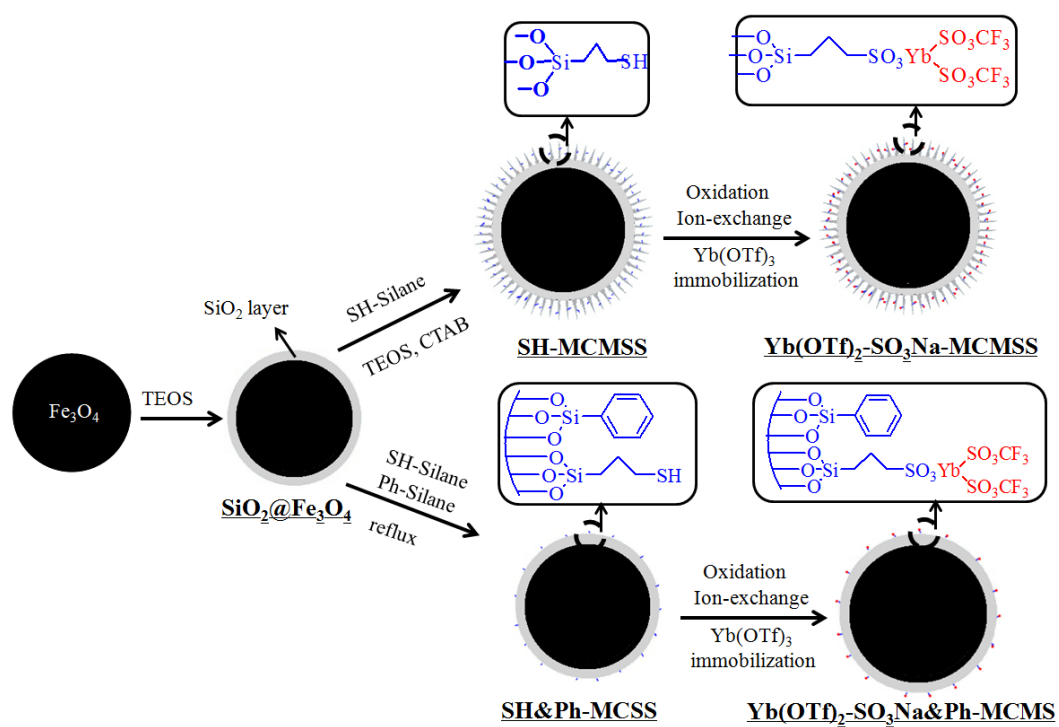

Scheme S1 Illustration of the synthetic procedures of  $\text{Yb}(\text{OTf})_2\text{-SO}_3\text{Na-MCMSS}$  and  $\text{Yb}(\text{OTf})_2\text{-SO}_3\text{Na\&Ph-MCSC}$  catalysts.

Table S1 The optimization of sulfur content in the Yb(OTf)<sub>2</sub>-SO<sub>3</sub>Na&Ph-MCMSS catalyst

| Entry | Molar ratio of TEOS and MPTS | Sulfur content (mmol/g) |
|-------|------------------------------|-------------------------|
| 1     | 15 : 1                       | 0.40                    |
| 2     | 7.0 : 1                      | 0.84                    |
| 3     | 4.3 : 1                      | 1.39                    |
| 4     | 3.0 : 1                      | 1.41                    |

Table S2 The optimization of Yb loading in the Yb(OTf)<sub>2</sub>-SO<sub>3</sub>Na&Ph-MCMSS catalyst

| Entry | Yb(OTf) <sub>3</sub> amount (mg) | Molar ratio of Yb and S | Solvent          | Yb loading (mmol/g) |
|-------|----------------------------------|-------------------------|------------------|---------------------|
| 1     | 43.6                             | 1 : 1                   | EtOH             | 0.154               |
| 2     | 86.8                             | 2 : 1                   | EtOH             | 0.201               |
| 3     | 130                              | 3 : 1                   | EtOH             | 0.217               |
| 4     | 43.6                             | 1 : 1                   | H <sub>2</sub> O | 0.176               |
| 5     | 86.8                             | 2 : 1                   | H <sub>2</sub> O | 0.265               |
| 6     | 130                              | 3 : 1                   | H <sub>2</sub> O | 0.281               |

Table S3 Catalytic performances of different samples in water-medium Sonogashira reactions.<sup>a</sup>

| Catalyst                                                      | Conversion (%) | Selectivity (%) | Yield (%) |
|---------------------------------------------------------------|----------------|-----------------|-----------|
| SiO <sub>2</sub> @Fe <sub>3</sub> O <sub>4</sub> <sup>b</sup> | /              | /               | /         |
| SH&Ph-MCMSS <sup>b</sup>                                      | /              | /               | /         |
| Yb(OTf) <sub>2</sub> -SO <sub>3</sub> Na&Ph-MCM-41            | 87.4           | 99              | 87.3      |
| Yb(OTf) <sub>2</sub> -SO <sub>3</sub> Na-Amberlyst-15         | 77.5           | 99              | 77.4      |

<sup>a</sup> Reactions conditions: 0.50 mmol benzaldehyde, 1.0 mmol silane, 0.050 mmol Yb, 3.0 ml water, 20°C, 16 h; <sup>b</sup> 100 mg sample.

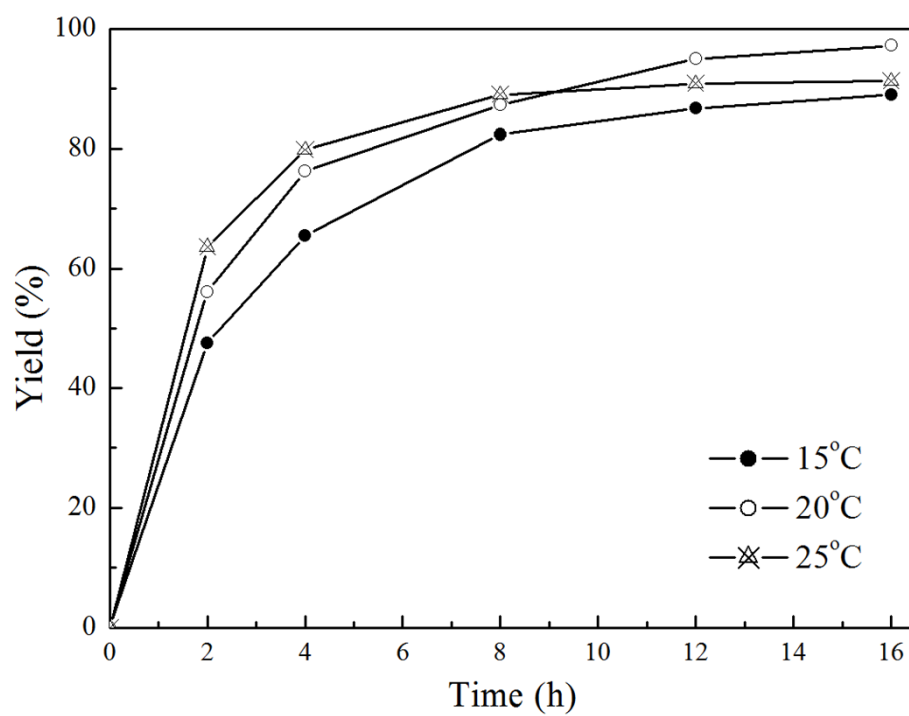

Figure S1 Dependence of yield on the reaction temperature over  $\text{Yb}(\text{OTf})_2\text{-SO}_3\text{Na}$ &Ph-MCMSS catalyst in water-medium Mukaiyama-aldol reaction between benzaldehyde and trimethyl(1-phenylprop-1-enyloxy)silane. Reaction conditions are given in Table 2.

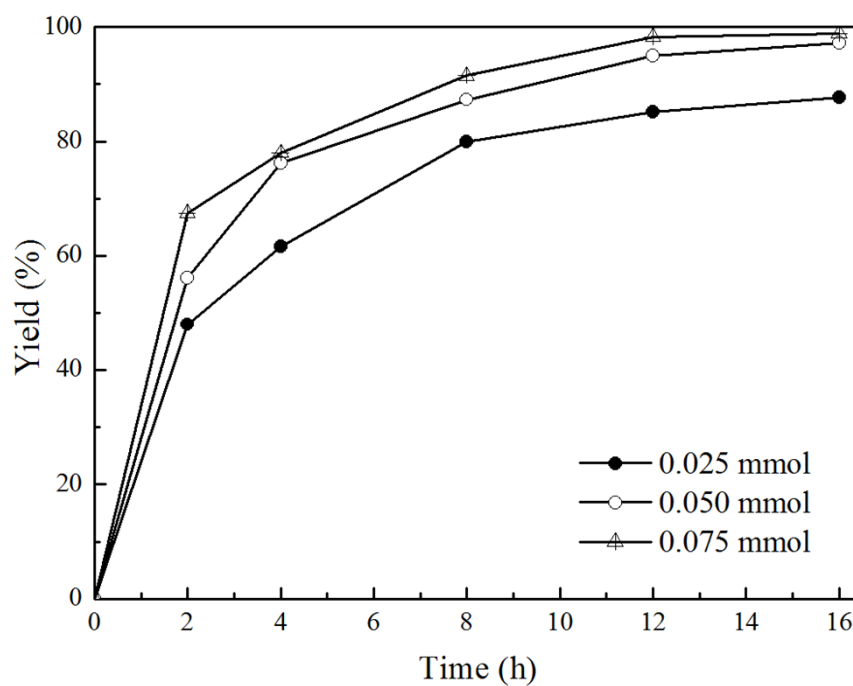

Figure S2 Dependence of yield on the different Yb loading over Yb(OTf)<sub>2</sub>-SO<sub>3</sub>Na&Ph-MCMSS catalyst in water-medium Mukaiyama-aldol reaction between benzaldehyde and trimethyl(1-phenylprop-1-enyloxy)silane s. Reaction conditions are given in Table 2.



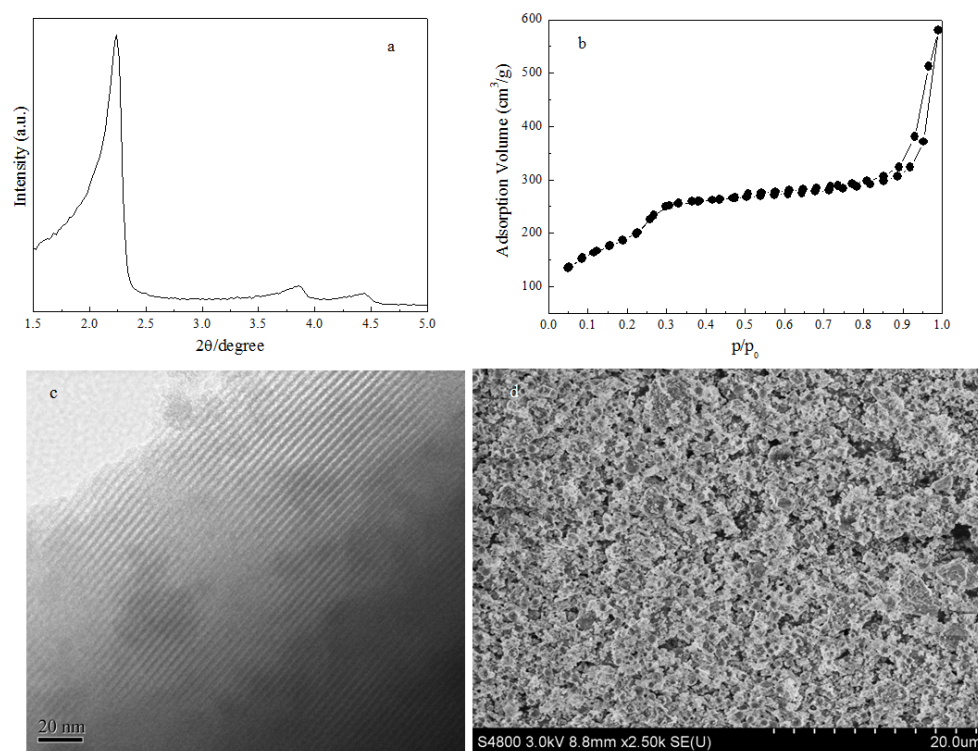

Figure S3 XRD pattern (a), N<sub>2</sub> sorption isotherm (b), TEM image (c) and SEM picture (d) of Yb(OTf)<sub>2</sub>-SO<sub>3</sub>Na&Ph-MCM-41 sample.

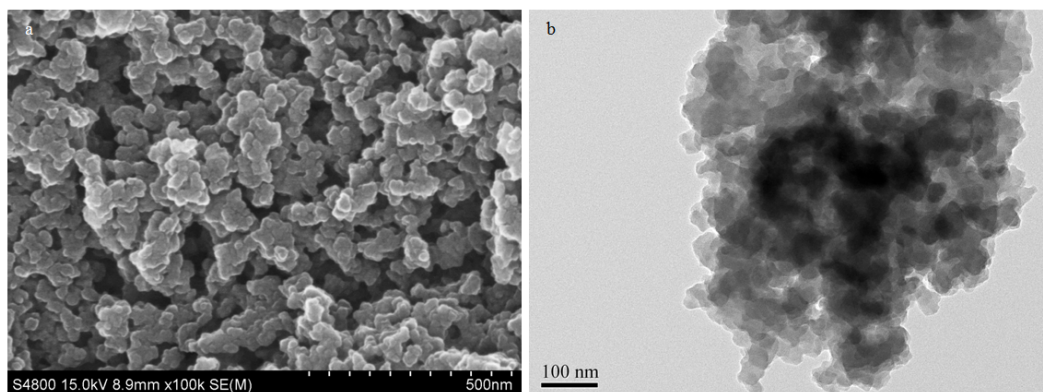

Figure S4 SEM image (a) and TEM picture (b) of  $\text{Yb}(\text{OTf})_2\text{-SO}_3\text{Na-Amberlyst-15}$  sample.

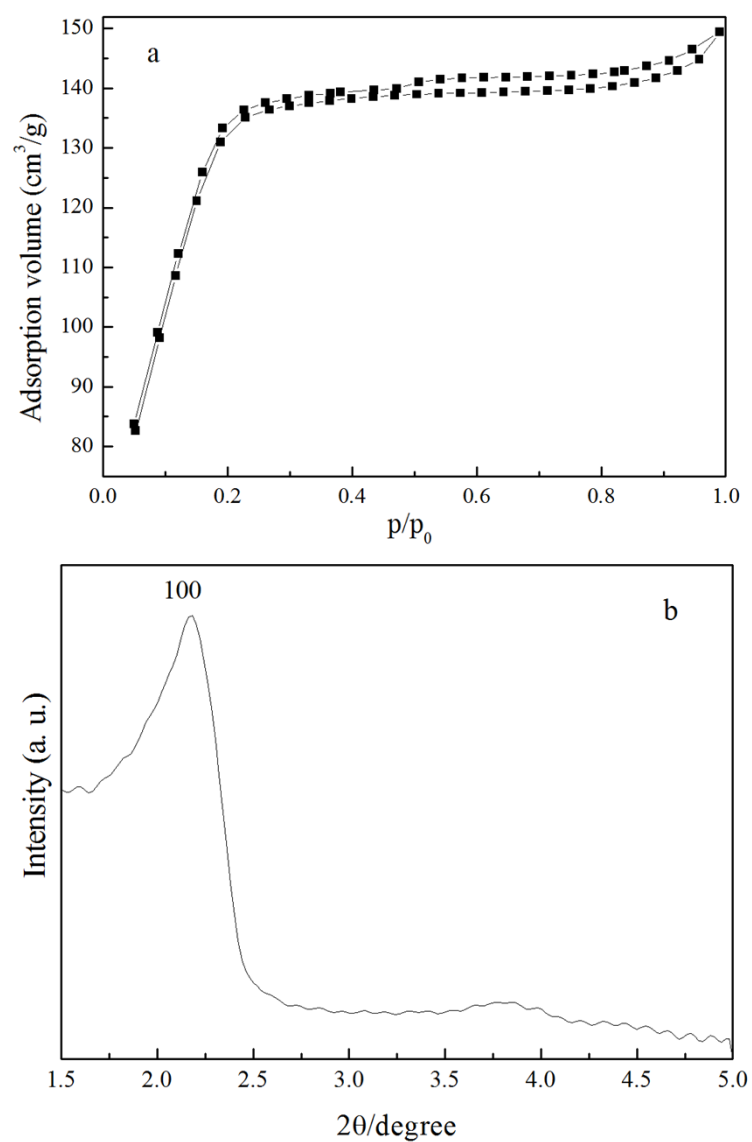

Figure S5 N<sub>2</sub> sorption curve (a) and low-angle XRD pattern (b) of the recycled Yb(OTf)<sub>2</sub>-SO<sub>3</sub>Na&Ph-MCMSS catalyst after six runs.

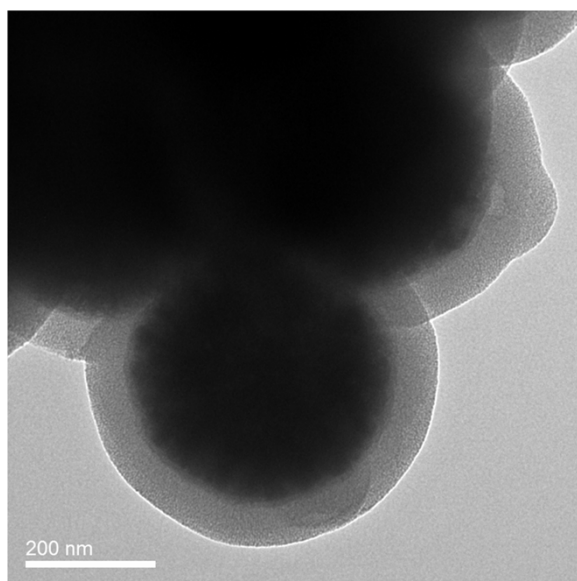

Figure S6 TEM image of the recycled  $\text{Yb}(\text{OTf})_2\text{-SO}_3\text{Na\&Ph-MCMSS}$  catalyst after six repetitions.
